# Supplementary material for: Complementary techniques to analyse pericellular matrix formation by human MSC within hyaluronic acid hydrogels
Source: Royal Society of Chemistry journal article supplement (doi:10.1039/d0ma00472c), 2020-01-01
Supplement: d0ma00472c2.pdf [file d0ma00472c2.pdf]

## Supplementary information

### Complementary techniques to analyse pericellular matrix formation by human MSC within hyaluronic acid hydrogels

*Christoph Salzlechner<sup>1</sup>†, Anders Runge Walther<sup>1,2</sup>†, Sophie Schell<sup>1,3</sup>, Nicholas Groth Merrild<sup>1</sup>, Tabasom Haghighi<sup>1</sup>, Isabella Huebscher<sup>1</sup>, Gerhard Undt<sup>4</sup>, Kathleen Fan<sup>5</sup>, Mads Bergholt<sup>1</sup>, Martin Hedegaard<sup>2</sup>, and Eileen Gentleman<sup>1\*</sup>*

<sup>1</sup> Centre for Craniofacial and Regenerative Biology, King's College London, London SE1 9RT, United Kingdom

<sup>2</sup> Department of Chemical Engineering, Biotechnology and Environmental Technology, University of Southern Denmark, DK-5230 Odense, Denmark

<sup>3</sup> Department of Conservative Dentistry, Centre of Dentistry, Oral Medicine and Maxillofacial Surgery, University Hospital Tübingen, 72076 Tübingen, Germany

<sup>4</sup> University Clinic of Dentistry, Department of Oral Surgery, Medical University of Vienna, Sensengasse 2a, 1090 Vienna, Austria

<sup>5</sup> Department of Oral and Maxillofacial Surgery, King's College Hospital, London, SE5 9RS, United Kingdom

†These authors contributed equally

\*To whom correspondence should be addressed: [eileen.gentleman@kcl.ac.uk](mailto:eileen.gentleman@kcl.ac.uk)

Highest academic title: Dr Christoph Salzlechner, Prof Gerhard Undt, Dr Sophie Schell, Dr Mads Bergholt, Dr Martin Hedegaard, Dr Kathleen Fan, Dr Eileen Gentleman

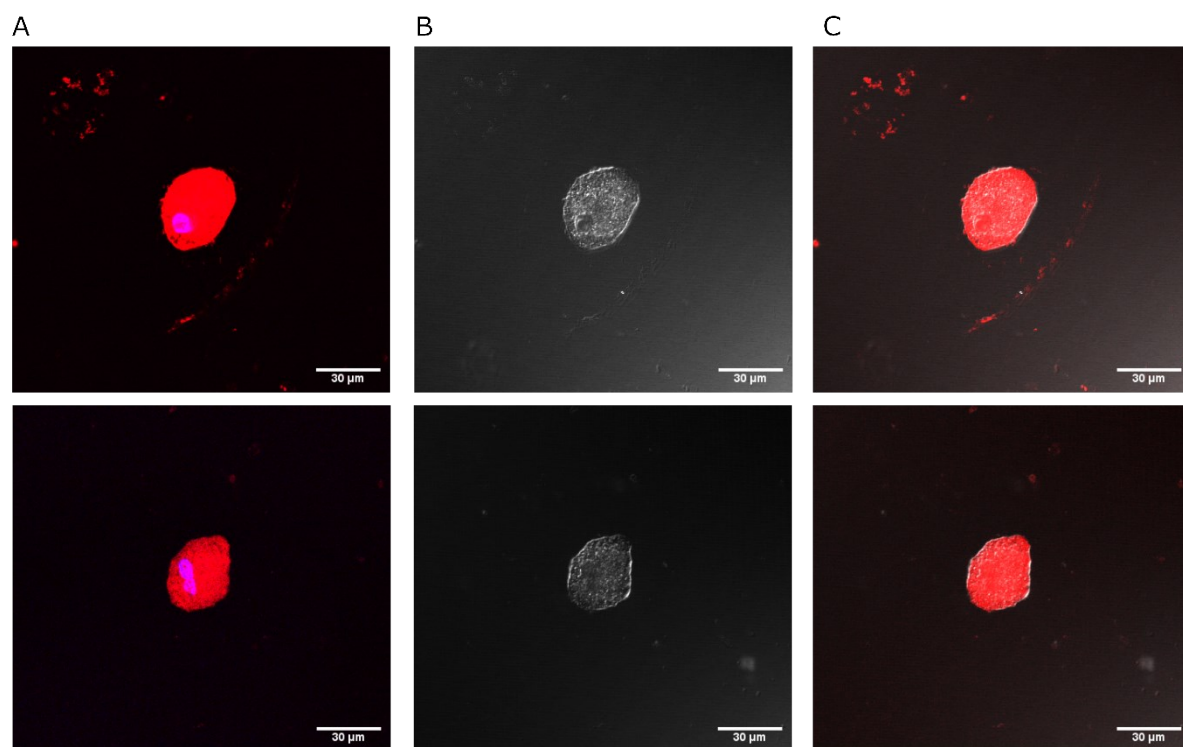

**Figure S1** Representative confocal images of hydrogel encapsulated MSCs. **(A)** Fluorescent non-canonical amino acid tagging (red) and nucleus (blue). **(B)** Differential interference contrast (DIC) images of the cells shown in **A** for visualization of cell outline and **(C)** merged view of red and DIC channels.
